# Supplementary material
Source: publisher figshare collection journal article supplement (https://acs.figshare.com/ndownloader/files/4518139)
Supplement: Supplementary file 1 [file 4518139]

 
data_mw1
 
_audit_creation_method            SHELXL-97
_chemical_name_systematic
;
 ?
;
_chemical_name_common             ?
_chemical_melting_point           ?
_chemical_formula_moiety          'C48 H53 Cl2 O2 Si2, 4(H2 O)'
_chemical_formula_sum
 'C48 H61 Cl2 O6 Si2'
_chemical_formula_weight          861.05
 
loop_
 _atom_type_symbol
 _atom_type_description
 _atom_type_scat_dispersion_real
 _atom_type_scat_dispersion_imag
 _atom_type_scat_source
 'C'  'C'   0.0181   0.0091
 'International Tables Vol C Tables 4.2.6.8 and 6.1.1.4'
 'H'  'H'   0.0000   0.0000
 'International Tables Vol C Tables 4.2.6.8 and 6.1.1.4'
 'O'  'O'   0.0492   0.0322
 'International Tables Vol C Tables 4.2.6.8 and 6.1.1.4'
 'Si'  'Si'   0.2541   0.3302
 'International Tables Vol C Tables 4.2.6.8 and 6.1.1.4'
 'Cl'  'Cl'   0.3639   0.7018
 'International Tables Vol C Tables 4.2.6.8 and 6.1.1.4'
 
_symmetry_cell_setting            Monoclinic
_symmetry_space_group_name_H-M    P21/a
 
loop_
 _symmetry_equiv_pos_as_xyz
 'x, y, z'
 '-x+1/2, y+1/2, -z'
 '-x, -y, -z'
 'x-1/2, -y-1/2, z'
 
_cell_length_a                    16.3914(3)
_cell_length_b                    9.8562(2)
_cell_length_c                    17.5824(4)
_cell_angle_alpha                 90.00
_cell_angle_beta                  116.3840(10)
_cell_angle_gamma                 90.00
_cell_volume                      2544.67(9)
_cell_formula_units_Z             2
_cell_measurement_temperature     296(2)
_cell_measurement_reflns_used     3604
_cell_measurement_theta_min       5.29
_cell_measurement_theta_max       70.98
 
_exptl_crystal_description        block
_exptl_crystal_colour             'colourless'
_exptl_crystal_size_max           0.24
_exptl_crystal_size_mid           0.20
_exptl_crystal_size_min           0.20
_exptl_crystal_density_meas       ?
_exptl_crystal_density_diffrn     1.124
_exptl_crystal_density_method     'not measured'
_exptl_crystal_F_000              918
_exptl_absorpt_coefficient_mu     1.933
_exptl_absorpt_correction_type    empirical
_exptl_absorpt_correction_T_min   0.6540
_exptl_absorpt_correction_T_max   0.6984
_exptl_absorpt_process_details    Sadabs
 
_exptl_special_details
;
 ?
;
 
_diffrn_ambient_temperature       296(2)
_diffrn_radiation_wavelength      1.54178
_diffrn_radiation_type            CuK\a
_diffrn_radiation_source          'fine-focus sealed tube'
_diffrn_radiation_monochromator   graphite
_diffrn_measurement_device_type   ?
_diffrn_measurement_method        ?
_diffrn_detector_area_resol_mean  ?
_diffrn_standards_number          ?
_diffrn_standards_interval_count  ?
_diffrn_standards_interval_time   ?
_diffrn_standards_decay_%         ?
_diffrn_reflns_number             16095
_diffrn_reflns_av_R_equivalents   0.0276
_diffrn_reflns_av_sigmaI/netI     0.0240
_diffrn_reflns_limit_h_min        -19
_diffrn_reflns_limit_h_max        17
_diffrn_reflns_limit_k_min        -11
_diffrn_reflns_limit_k_max        12
_diffrn_reflns_limit_l_min        -21
_diffrn_reflns_limit_l_max        21
_diffrn_reflns_theta_min          5.29
_diffrn_reflns_theta_max          70.98
_reflns_number_total              4593
_reflns_number_gt                 3604
_reflns_threshold_expression      >2sigma(I)
 
_computing_data_collection        ?
_computing_cell_refinement        ?
_computing_data_reduction         ?
_computing_structure_solution     ?
_computing_structure_refinement   'SHELXL-97 (Sheldrick, 1997)'
_computing_molecular_graphics     ?
_computing_publication_material   ?
 
_refine_special_details
;
 Refinement of F^2^ against ALL reflections.  The weighted R-factor wR and
 goodness of fit S are based on F^2^, conventional R-factors R are based
 on F, with F set to zero for negative F^2^. The threshold expression of
 F^2^ > 2sigma(F^2^) is used only for calculating R-factors(gt) etc. and is
 not relevant to the choice of reflections for refinement.  R-factors based
 on F^2^ are statistically about twice as large as those based on F, and R-
 factors based on ALL data will be even larger.
;
 
_refine_ls_structure_factor_coef  Fsqd
_refine_ls_matrix_type            full
_refine_ls_weighting_scheme       calc
_refine_ls_weighting_details
 'calc w=1/[\s^2^(Fo^2^)+(0.0881P)^2^+0.4121P] where P=(Fo^2^+2Fc^2^)/3'
_atom_sites_solution_primary      direct
_atom_sites_solution_secondary    difmap
_atom_sites_solution_hydrogens    geom
_refine_ls_hydrogen_treatment     constr
_refine_ls_extinction_method      none
_refine_ls_extinction_coef        ?
_refine_ls_number_reflns          4593
_refine_ls_number_parameters      273
_refine_ls_number_restraints      0
_refine_ls_R_factor_all           0.0607
_refine_ls_R_factor_gt            0.0473
_refine_ls_wR_factor_ref          0.1469
_refine_ls_wR_factor_gt           0.1337
_refine_ls_goodness_of_fit_ref    1.018
_refine_ls_restrained_S_all       1.018
_refine_ls_shift/su_max           0.005
_refine_ls_shift/su_mean          0.000
 
loop_
 _atom_site_label
 _atom_site_type_symbol
 _atom_site_fract_x
 _atom_site_fract_y
 _atom_site_fract_z
 _atom_site_U_iso_or_equiv
 _atom_site_adp_type
 _atom_site_occupancy
 _atom_site_symmetry_multiplicity
 _atom_site_calc_flag
 _atom_site_refinement_flags
 _atom_site_disorder_assembly
 _atom_site_disorder_group
C1 C 0.9878(2) 0.6362(3) 0.48449(18) 0.0874(8) Uani 1 1 d . A 1
H1 H 0.9797 0.7291 0.4747 0.105 Uiso 1 1 calc R A 1
C2 C 0.9956(2) 0.5838(3) 0.56044(18) 0.0862(7) Uani 1 1 d . . 1
H2 H 0.9922 0.6416 0.6008 0.103 Uiso 1 1 calc R . 1
C3 C 0.99162(15) 0.5534(3) 0.42310(15) 0.0717(6) Uani 1 1 d . . 1
C4 C 0.98405(16) 0.6082(3) 0.34470(16) 0.0738(6) Uani 1 1 d . B 1
C5 C 0.97889(14) 0.6540(2) 0.28013(14) 0.0644(5) Uani 1 1 d . B 1
C6 C 0.97562(13) 0.71208(19) 0.20439(12) 0.0545(5) Uani 1 1 d . B 1
C7 C 0.99445(15) 0.6354(2) 0.15165(15) 0.0651(5) Uani 0.524(5) 1 d P B 1
C8 C 0.9984(2) 0.6783(3) 0.07125(18) 0.0826(7) Uani 0.524(5) 1 d P B 1
H8A H 0.9999 0.7767 0.0698 0.099 Uiso 0.524(5) 1 calc PR B 1
H8B H 1.0549 0.6453 0.0729 0.099 Uiso 0.524(5) 1 calc PR B 1
C9 C 0.90186(17) 0.9755(2) 0.25648(15) 0.0707(6) Uani 1 1 d . B 1
C10 C 0.8187(2) 0.8940(4) 0.2485(2) 0.1015(10) Uani 1 1 d . B 1
H10A H 0.7930 0.9361 0.2821 0.152 Uiso 1 1 calc R B 1
H10B H 0.8371 0.8030 0.2683 0.152 Uiso 1 1 calc R B 1
H10C H 0.7741 0.8918 0.1901 0.152 Uiso 1 1 calc R B 1
C11 C 0.8708(3) 1.1214(3) 0.2255(2) 0.1078(11) Uani 1 1 d . B 1
H11A H 0.9225 1.1748 0.2321 0.162 Uiso 1 1 calc R B 1
H11B H 0.8432 1.1607 0.2583 0.162 Uiso 1 1 calc R B 1
H11C H 0.8274 1.1196 0.1667 0.162 Uiso 1 1 calc R B 1
C12 C 0.9726(2) 0.9810(3) 0.34957(17) 0.0930(8) Uani 1 1 d . B 1
H12A H 0.9962 0.8916 0.3683 0.140 Uiso 1 1 calc R B 1
H12B H 0.9445 1.0146 0.3835 0.140 Uiso 1 1 calc R B 1
H12C H 1.0214 1.0403 0.3552 0.140 Uiso 1 1 calc R B 1
C13 C 0.87339(14) 0.9329(2) 0.07388(13) 0.0565(5) Uani 1 1 d . B 1
C14 C 0.88739(17) 1.0244(2) 0.02069(15) 0.0708(6) Uani 1 1 d . B 1
H14 H 0.9418 1.0726 0.0408 0.085 Uiso 1 1 calc R B 1
C15 C 0.8211(2) 1.0450(3) -0.06235(17) 0.0908(9) Uani 1 1 d . B 1
H15 H 0.8317 1.1067 -0.0970 0.109 Uiso 1 1 calc R B 1
C16 C 0.7411(2) 0.9755(3) -0.09314(17) 0.0918(9) Uani 1 1 d . B 1
H16 H 0.6970 0.9902 -0.1485 0.110 Uiso 1 1 calc R B 1
C17 C 0.7256(2) 0.8841(3) -0.04271(18) 0.0914(8) Uani 1 1 d . B 1
H17 H 0.6709 0.8367 -0.0635 0.110 Uiso 1 1 calc R B 1
C18 C 0.79140(17) 0.8620(3) 0.03927(16) 0.0773(7) Uani 1 1 d . B 1
H18 H 0.7806 0.7977 0.0724 0.093 Uiso 1 1 calc R B 1
C19 C 1.07003(14) 0.9796(2) 0.22123(13) 0.0572(5) Uani 1 1 d . B 1
C20 C 1.14780(14) 0.9045(2) 0.26750(14) 0.0627(5) Uani 1 1 d . B 1
H20 H 1.1421 0.8129 0.2769 0.075 Uiso 1 1 calc R B 1
C21 C 1.23366(16) 0.9614(3) 0.30016(17) 0.0782(7) Uani 1 1 d . B 1
H21 H 1.2845 0.9087 0.3323 0.094 Uiso 1 1 calc R B 1
C22 C 1.24425(18) 1.0947(3) 0.2855(2) 0.0921(9) Uani 1 1 d . B 1
H22 H 1.3020 1.1334 0.3079 0.111 Uiso 1 1 calc R B 1
C23 C 1.1688(2) 1.1708(3) 0.2374(2) 0.1042(10) Uani 1 1 d . B 1
H23 H 1.1756 1.2611 0.2259 0.125 Uiso 1 1 calc R B 1
C24 C 1.08307(17) 1.1147(2) 0.2059(2) 0.0845(8) Uani 1 1 d . B 1
H24 H 1.0327 1.1682 0.1737 0.101 Uiso 1 1 calc R B 1
Si1 Si 0.95450(3) 0.90298(5) 0.18793(3) 0.05017(17) Uani 1 1 d . B 1
Cl1 Cl 1.01970(5) 0.46369(6) 0.17342(6) 0.0995(3) Uani 1 1 d . B 1
O1 O 0.9278(3) 0.6337(5) -0.0019(3) 0.1129(18) Uani 0.524(5) 1 d P B 1
C7A C 0.99445(15) 0.6354(2) 0.15165(15) 0.0651(5) Uani 0.476(5) 1 d P B 2
C8A C 0.9984(2) 0.6783(3) 0.07125(18) 0.0826(7) Uani 0.476(5) 1 d P B 2
H8C H 0.9471 0.6393 0.0231 0.099 Uiso 0.476(5) 1 calc PR B 2
H8D H 0.9930 0.7763 0.0662 0.099 Uiso 0.476(5) 1 calc PR B 2
O1A O 1.0782(3) 0.6388(4) 0.0687(3) 0.0954(16) Uani 0.476(5) 1 d P B 2
O2 O 1.2397(7) 1.0810(17) 0.5447(7) 0.227(4) Uiso 0.50 1 d P C 2
O3 O 1.2382(9) 0.957(2) 0.5517(9) 0.255(5) Uiso 0.50 1 d P C 2
O4 O 1.2459(10) 1.196(2) 0.4970(10) 0.296(6) Uiso 0.50 1 d P . 2
O5 O 1.2496(12) 0.851(3) 0.5299(11) 0.332(8) Uiso 0.50 1 d P . 2
 
loop_
 _atom_site_aniso_label
 _atom_site_aniso_U_11
 _atom_site_aniso_U_22
 _atom_site_aniso_U_33
 _atom_site_aniso_U_23
 _atom_site_aniso_U_13
 _atom_site_aniso_U_12
C1 0.0978(19) 0.0736(15) 0.0859(18) 0.0335(14) 0.0364(15) 0.0032(13)
C2 0.0968(19) 0.0804(17) 0.0798(16) 0.0258(14) 0.0378(15) 0.0027(14)
C3 0.0579(12) 0.0773(15) 0.0717(14) 0.0299(12) 0.0213(11) -0.0026(10)
C4 0.0628(13) 0.0722(15) 0.0773(15) 0.0276(12) 0.0229(12) -0.0012(10)
C5 0.0587(12) 0.0561(12) 0.0713(13) 0.0189(10) 0.0226(10) -0.0019(9)
C6 0.0530(10) 0.0460(10) 0.0605(11) 0.0111(9) 0.0218(9) 0.0006(8)
C7 0.0656(12) 0.0447(10) 0.0814(14) 0.0054(10) 0.0296(11) 0.0071(9)
C8 0.1011(19) 0.0728(16) 0.0889(18) 0.0014(13) 0.0558(16) 0.0204(14)
C9 0.0768(14) 0.0708(14) 0.0735(14) 0.0026(11) 0.0416(12) 0.0118(11)
C10 0.0829(18) 0.135(3) 0.112(2) 0.0040(19) 0.0660(18) 0.0048(17)
C11 0.137(3) 0.0843(19) 0.122(2) 0.0068(17) 0.076(2) 0.0469(19)
C12 0.117(2) 0.097(2) 0.0728(16) -0.0117(14) 0.0496(16) -0.0019(17)
C13 0.0594(11) 0.0521(10) 0.0605(11) 0.0095(9) 0.0290(10) 0.0105(8)
C14 0.0710(14) 0.0767(15) 0.0714(14) 0.0184(12) 0.0376(12) 0.0082(11)
C15 0.102(2) 0.107(2) 0.0721(16) 0.0330(15) 0.0460(16) 0.0260(17)
C16 0.0844(19) 0.118(2) 0.0604(14) 0.0095(15) 0.0210(14) 0.0271(17)
C17 0.0735(16) 0.103(2) 0.0784(17) -0.0044(16) 0.0165(14) -0.0047(14)
C18 0.0738(15) 0.0763(15) 0.0728(14) 0.0094(12) 0.0244(13) -0.0078(12)
C19 0.0571(11) 0.0486(10) 0.0672(12) 0.0057(9) 0.0287(10) 0.0026(8)
C20 0.0581(11) 0.0570(12) 0.0686(13) 0.0110(10) 0.0243(10) 0.0027(9)
C21 0.0560(12) 0.0826(17) 0.0874(16) 0.0126(13) 0.0241(12) 0.0035(11)
C22 0.0601(14) 0.0839(18) 0.120(2) 0.0079(16) 0.0286(15) -0.0150(12)
C23 0.0799(17) 0.0606(15) 0.155(3) 0.0166(17) 0.0365(18) -0.0146(13)
C24 0.0644(14) 0.0528(12) 0.124(2) 0.0162(13) 0.0307(15) 0.0015(10)
Si1 0.0519(3) 0.0443(3) 0.0565(3) 0.0080(2) 0.0260(2) 0.0045(2)
Cl1 0.1050(5) 0.0465(3) 0.1346(6) 0.0053(3) 0.0421(5) 0.0141(3)
O1 0.143(4) 0.106(3) 0.086(3) -0.020(2) 0.048(3) 0.025(3)
C7A 0.0656(12) 0.0447(10) 0.0814(14) 0.0054(10) 0.0296(11) 0.0071(9)
C8A 0.1011(19) 0.0728(16) 0.0889(18) 0.0014(13) 0.0558(16) 0.0204(14)
O1A 0.099(3) 0.090(3) 0.125(4) -0.016(2) 0.075(3) 0.002(2)
 
_geom_special_details
;
 All esds (except the esd in the dihedral angle between two l.s. planes)
 are estimated using the full covariance matrix.  The cell esds are taken
 into account individually in the estimation of esds in distances, angles
 and torsion angles; correlations between esds in cell parameters are only
 used when they are defined by crystal symmetry.  An approximate (isotropic)
 treatment of cell esds is used for estimating esds involving l.s. planes.
;
 
loop_
 _geom_bond_atom_site_label_1
 _geom_bond_atom_site_label_2
 _geom_bond_distance
 _geom_bond_site_symmetry_2
 _geom_bond_publ_flag
C1 C3 1.376(4) . ?
C1 C2 1.383(4) . ?
C2 C3 1.380(3) 3_766 ?
C3 C2 1.380(3) 3_766 ?
C3 C4 1.433(3) . ?
C4 C5 1.190(3) . ?
C5 C6 1.428(3) . ?
C6 C7 1.334(3) . ?
C6 Si1 1.9117(19) . ?
C7 C8 1.504(3) . ?
C7 Cl1 1.744(2) . ?
C8 O1 1.365(5) . ?
C9 C12 1.529(4) . ?
C9 C10 1.533(4) . ?
C9 C11 1.543(4) . ?
C9 Si1 1.906(2) . ?
C13 C14 1.390(3) . ?
C13 C18 1.392(3) . ?
C13 Si1 1.872(2) . ?
C14 C15 1.394(4) . ?
C15 C16 1.360(4) . ?
C16 C17 1.365(4) . ?
C17 C18 1.381(4) . ?
C19 C20 1.383(3) . ?
C19 C24 1.393(3) . ?
C19 Si1 1.875(2) . ?
C20 C21 1.381(3) . ?
C21 C22 1.364(4) . ?
C22 C23 1.370(4) . ?
C23 C24 1.377(4) . ?
O2 O3 1.229(14) . ?
O2 O4 1.437(15) . ?
O3 O5 1.15(2) . ?
O4 O5 1.62(2) 2_756 ?
O5 O4 1.62(2) 2_746 ?
 
loop_
 _geom_angle_atom_site_label_1
 _geom_angle_atom_site_label_2
 _geom_angle_atom_site_label_3
 _geom_angle
 _geom_angle_site_symmetry_1
 _geom_angle_site_symmetry_3
 _geom_angle_publ_flag
C3 C1 C2 121.3(3) . . ?
C3 C2 C1 120.6(3) 3_766 . ?
C1 C3 C2 118.2(2) . 3_766 ?
C1 C3 C4 121.1(2) . . ?
C2 C3 C4 120.7(3) 3_766 . ?
C5 C4 C3 179.2(3) . . ?
C4 C5 C6 177.9(2) . . ?
C7 C6 C5 119.79(19) . . ?
C7 C6 Si1 122.29(15) . . ?
C5 C6 Si1 117.68(16) . . ?
C6 C7 C8 127.88(19) . . ?
C6 C7 Cl1 120.17(18) . . ?
C8 C7 Cl1 111.95(17) . . ?
O1 C8 C7 114.9(3) . . ?
C12 C9 C10 109.7(2) . . ?
C12 C9 C11 108.6(2) . . ?
C10 C9 C11 108.4(2) . . ?
C12 C9 Si1 110.44(18) . . ?
C10 C9 Si1 112.29(18) . . ?
C11 C9 Si1 107.28(17) . . ?
C14 C13 C18 116.6(2) . . ?
C14 C13 Si1 124.87(18) . . ?
C18 C13 Si1 118.50(16) . . ?
C13 C14 C15 120.9(2) . . ?
C16 C15 C14 120.6(3) . . ?
C15 C16 C17 119.9(3) . . ?
C16 C17 C18 119.9(3) . . ?
C17 C18 C13 122.1(2) . . ?
C20 C19 C24 116.4(2) . . ?
C20 C19 Si1 120.48(15) . . ?
C24 C19 Si1 123.02(16) . . ?
C21 C20 C19 122.0(2) . . ?
C22 C21 C20 120.3(2) . . ?
C21 C22 C23 119.2(2) . . ?
C22 C23 C24 120.5(2) . . ?
C23 C24 C19 121.5(2) . . ?
C13 Si1 C19 114.15(9) . . ?
C13 Si1 C9 108.22(10) . . ?
C19 Si1 C9 109.26(11) . . ?
C13 Si1 C6 108.16(9) . . ?
C19 Si1 C6 105.04(9) . . ?
C9 Si1 C6 112.06(10) . . ?
O3 O2 O4 148.1(14) . . ?
O5 O3 O2 148.2(19) . . ?
O2 O4 O5 160.1(13) . 2_756 ?
O3 O5 O4 171.6(19) . 2_746 ?
 
_diffrn_measured_fraction_theta_max    0.933
_diffrn_reflns_theta_full              70.98
_diffrn_measured_fraction_theta_full   0.933
_refine_diff_density_max    0.372
_refine_diff_density_min   -0.227
_refine_diff_density_rms    0.048
